# Supplementary material for: Hexose enhances oligonucleotide delivery and exon skipping in dystrophin-deficient mdx mice
Source: PubMed Central journal article supplement (PMC4793046; doi:10.1038/ncomms10981), 2016-03-11
Supplement: ncomms10981-s1.pdf [file ncomms10981-s1.pdf]

**Supplementary Fig. 1**

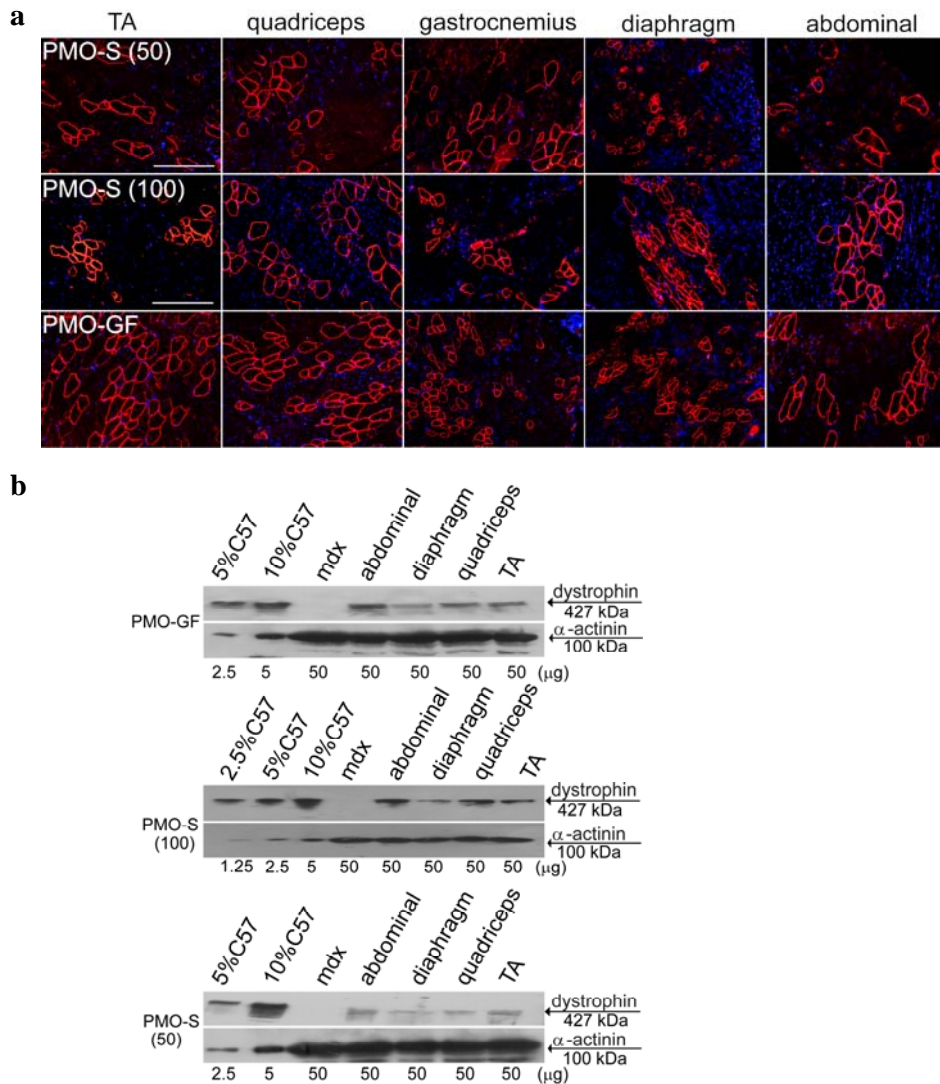

**Supplementary Figure 1.**

**Comparison between PMO-GF and PMO-S at different doses in *mdx* mice.**

(a) Immunohistochemistry for dystrophin in body-wide muscles of *mdx* mice treated with PMO-GF or PMO-S at 50 mg kg<sup>-1</sup>week<sup>-1</sup> or 100 mg kg<sup>-1</sup>week<sup>-1</sup> for 3 weeks intravenously, respectively. Samples were harvested 2 weeks after last injection (scale bar=200  $\mu$ m). (50) or (100) refers to 50 or 100 mg kg<sup>-1</sup>week<sup>-1</sup> for 3 weeks; PMO-GF was injected at 50 mg kg<sup>-1</sup>week<sup>-1</sup> for 3 weeks.

(b) Western blot to detect dystrophin protein in treated *mdx* mice. Protein loading was labelled below the image and TA muscles from *C57BL6* were used as normal controls. And  $\alpha$ -actinin was used as the loading control.

## Supplementary Fig. 2

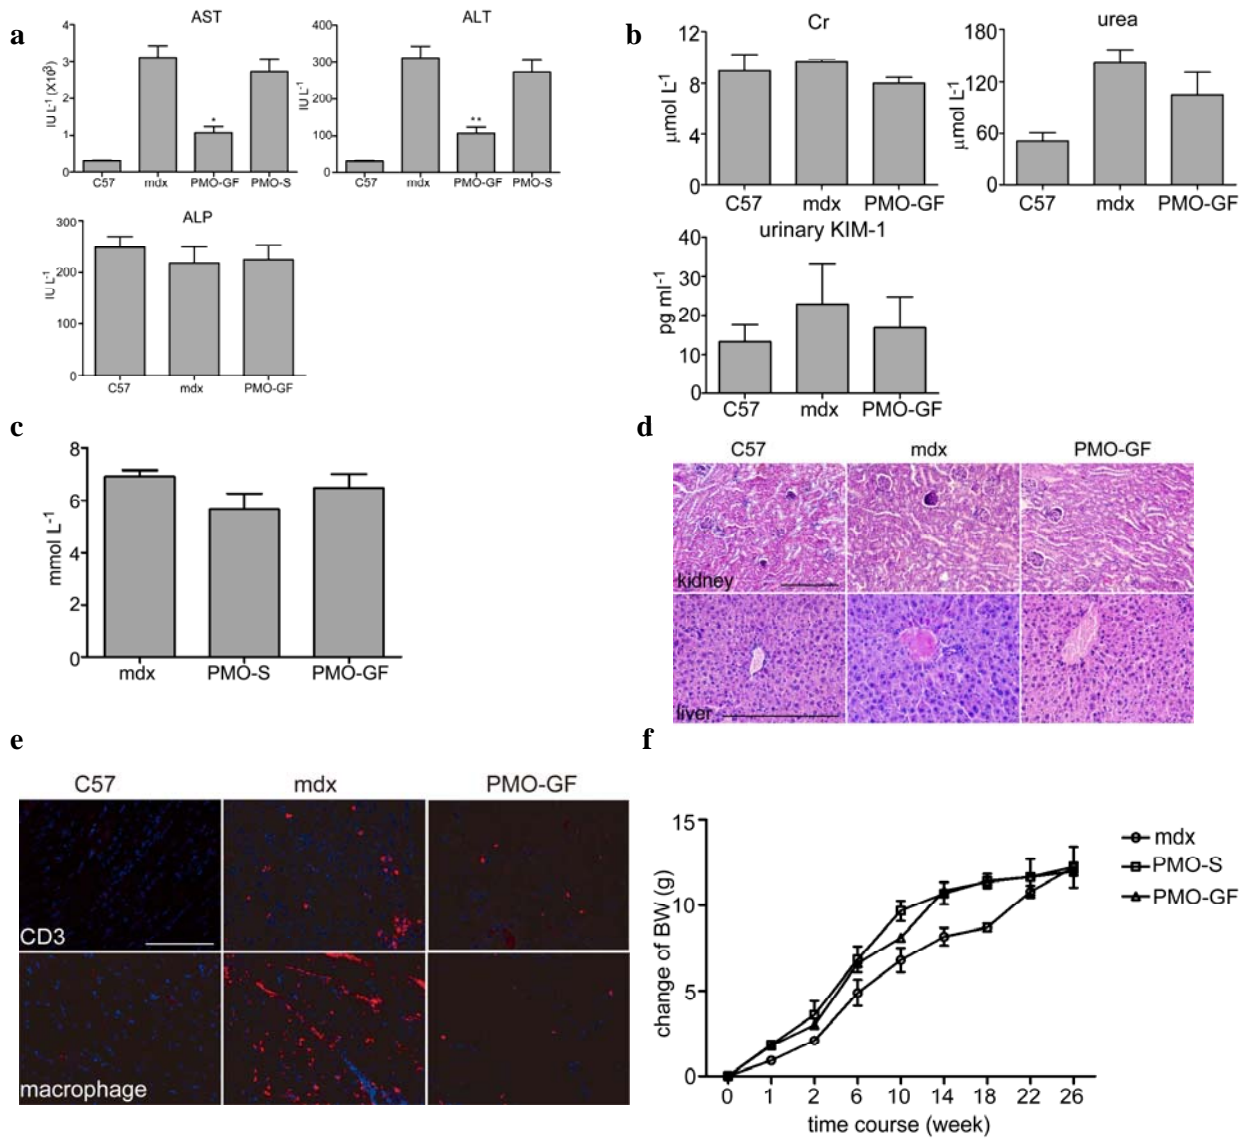

## Supplementary Figure 2

### Biochemical and histological measures of toxicity in PMO-GF treated *mdx* mice.

(a) Measurement of serum levels of liver enzymes in *mdx* mice treated with PMO-GF compared to normal and untreated *mdx* mice. Data show improved pathological parameters in *mdx* mice treated with PMO-GF compared with PMO-S and untreated *mdx* controls in levels of AST (n=6, error bars are  $\pm$ s.e.m; two-tailed t test, \*\*P=0.002) and ALT (n=6, error bars are  $\pm$ s.e.m; two-tailed t test, \*P=0.045). And no change in the level of serum alkaline phosphatase (ALP) between *mdx* mice treated with PMO-GF and untreated *mdx* controls (n=6, error bars are  $\pm$ s.e.m) indicated no liver toxicity elicited by the repeated administration of PMO-GF.

(b) Analysis of biochemical indicators for kidney function in *mdx* mice treated with PMO-GF. Data show no difference in the level of serum creatinine (Cr), urea and urinary kidney injury molecule-1 (KIM-1) in *mdx* mice treated with PMO-GF compared with untreated *mdx* and normal controls (n=6, error bars are  $\pm$ s.e.m; two-tailed t test, P>0.05), indicating no kidney injury triggered by the use of PMO-GF in *mdx* mice.

(c) Analysis of glucose level in *mdx* mice treated with PMO-GF. Data show no difference in the level of glucose in *mdx* mice treated with PMO-GF compared with untreated *mdx* and normal controls (n=6, error bars are  $\pm$ s.e.m; two-tailed t test, P>0.05).

(d) Hematoxylin & eosin staining of kidney (upper panel) and liver (lower panel) tissues sections from treated *mdx* mice, untreated *mdx* and *C57BL6* normal controls (scale bar=200  $\mu$ m).

(e) Detection of CD3<sup>+</sup> T lymphocytes and macrophage in diaphragm muscles from *mdx* mice treated with PMO-GF (scale bar=200  $\mu$ m). Data show fewer CD3<sup>+</sup> T lymphocytes and macrophage in treated diaphragm muscle compared with untreated controls.

(f) Body-weight measurements of *mdx* mice treated with PMO-GF or PMO-S over 26 weeks. Data shows a steady body-weight increase and the same pattern of growth with both treatments as untreated *mdx* controls (n=6, error bars are  $\pm$ s.e.m). BW refers to Body Weight.

Supplementary Fig. 3

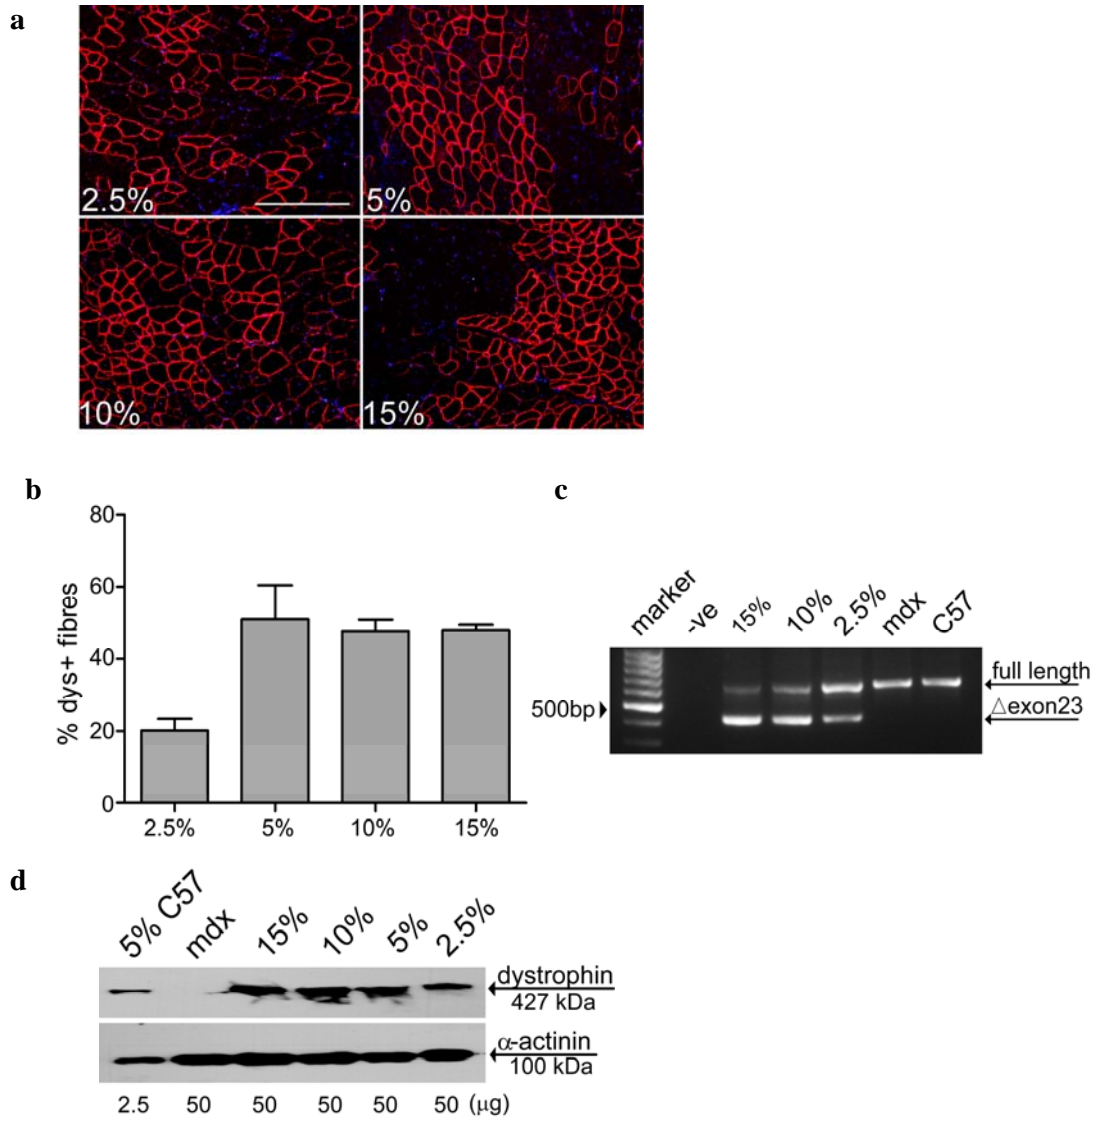

### Supplementary Figure 3

#### Saturation effects of GF on increasing PMO exon skipping activity in *mdx* mice.

(a) Immunohistochemistry for dystrophin in *mdx* TA muscles following intramuscular injection 2  $\mu$ g PMO formulated in different concentrations of GF in *mdx* mice (scale bar=200  $\mu$ m).

(b) Quantitative evaluation of dystrophin-positive fibres in treated TA muscles. The data are presented as percent of dystrophin-positive fibres (n=6, error bars are  $\pm$ s.e.m;).

(c) RT-PCR for detecting exon-skipping efficiency at the RNA level, which is shown by shorter exon-skipped bands (indicated by the numbered  $\Delta$ exon23 - exon 23 skipped).

(d) Western blot analysis of treated TA muscles. Protein loading was labelled below the image and TA muscles from *C57BL6* were used as normal controls. And  $\alpha$ -actinin was used as the loading control.

#### Supplementary Fig. 4

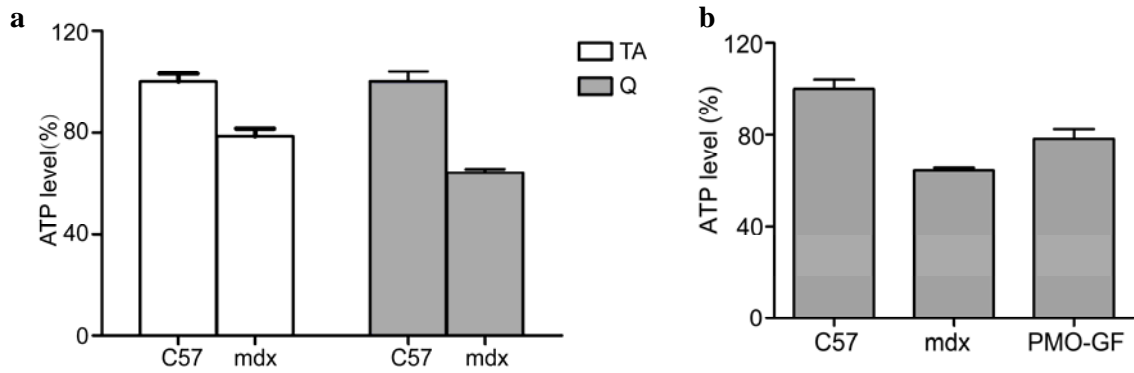

#### Supplementary Figure 4

##### Measurement of ATP levels in PMO-GF treated *mdx* and control mice.

(a) Basal levels of ATP in quadriceps (Q) and TA muscles from *mdx* and age-matched *C57BL6* mice were examined with CellTiter-Glo® Luminescent Cell Viability Assay kit (n=4, error bars are  $\pm$ s.e.m).

(b) Levels of ATP in quadriceps from *mdx* mice treated with PMO-GF at the dose of 50 mg kg<sup>-1</sup>week<sup>-1</sup> for 3 weeks followed by 50 mg kg<sup>-1</sup>month<sup>-1</sup> for 5 months and compared with age-matched *mdx* and *C57BL6* mice (n=4, error bars are  $\pm$ s.e.m).

Supplementary Fig. 5

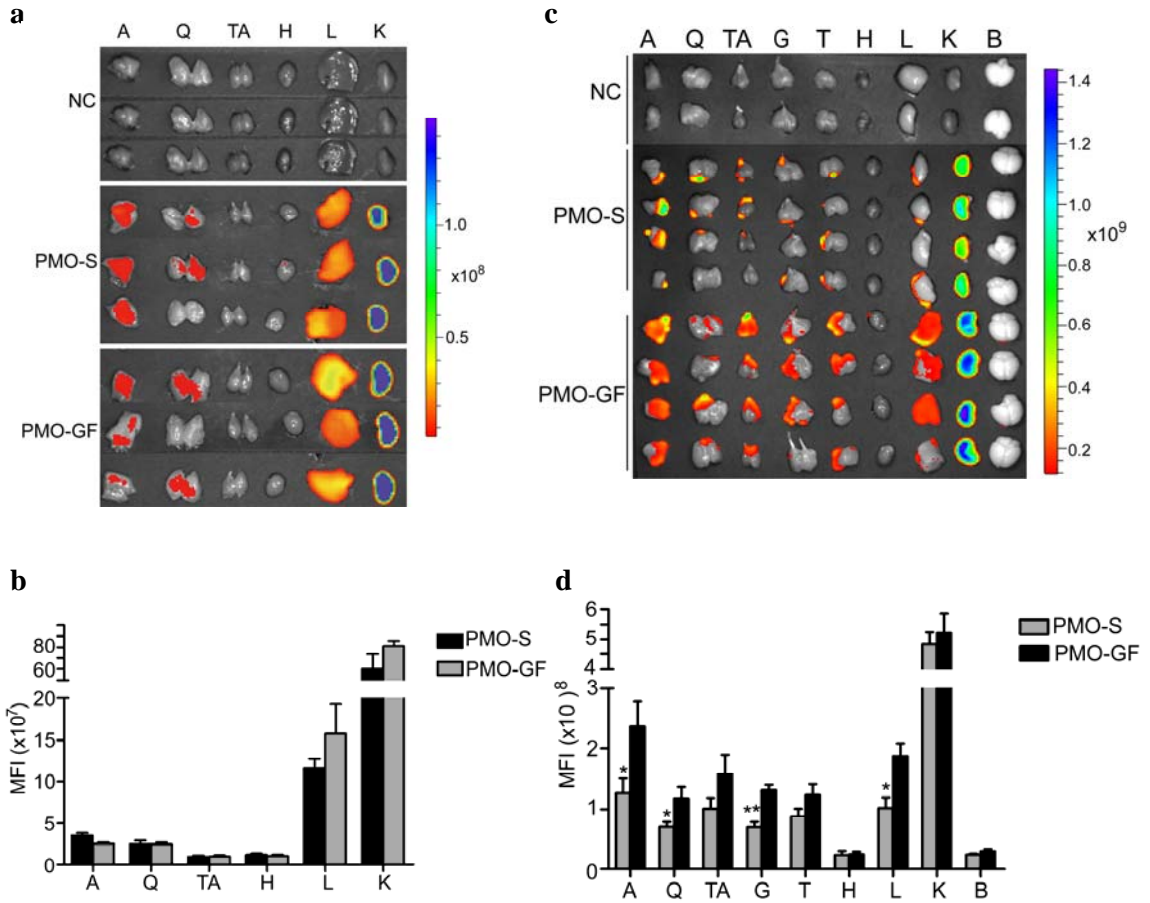

## Supplementary Figure 5

### Tissue distribution of lissamine-labelled PMO in *C57BL6* or *SOD1* mice.

(a) Measurement of tissue distribution of lissamine-labelled PMO in body-wide tissues with IVIS spectrum series in *C57BL6* mice. Lissamine-labelled PMO was injected into *C57BL6* mice intravenously at the dose of  $25 \text{ mg kg}^{-1} \text{ day}^{-1}$  for 3 days and body-wide tissues were harvested 4 days after last injection.

(b) Quantitative analysis of mean fluorescence intensity in body-wide tissues from *C57BL6* mice treated with labelled PMO-GF or PMO-S (n=4, error bars are  $\pm$ s.e.m).

(c) Measurement of tissue distribution of lissamine-labelled PMO in body-wide tissues with IVIS spectrum series in *SOD1* mice. A-abdominal muscle, Q-quadiceps, TA-tibialis anterior, G-gastrocnemius, T-triceps, H-heart, L-liver, K-kidney and B=brain.

(d) Quantitative analysis of mean fluorescence intensity in body-wide tissues from *SOD1* mice treated with labelled PMO-GF or PMO-S. Significant increase in mean fluorescence intensity was observed in Q, L (n=4, error bars are  $\pm$ s.e.m; two-tailed t test, \*P<0.05) and G (n=4, error bars are  $\pm$ s.e.m; two-tailed t test, \*\*P=0.003) from *SOD1* mice treated with PMO-GF compared to counterparts treated with PMO-S.



**Supplementary Fig. 6**

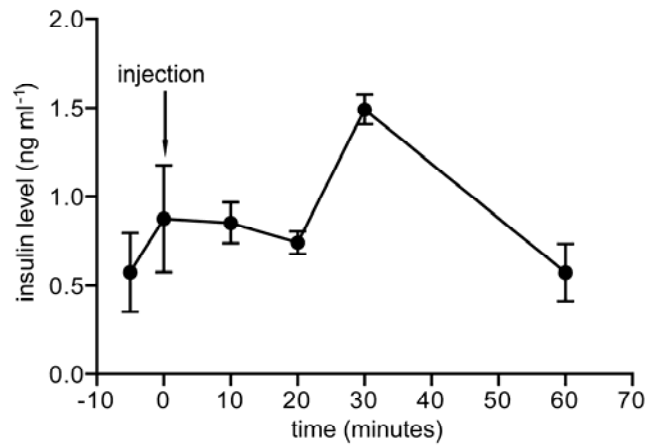

**Supplementary Figure 6**

**Measurement of plasma insulin before and after GF administration in *mdx* mice.**

GF (100  $\mu$ l) was administered into adult *mdx* mice intravenously and plasma was harvested at different time-points including 5 min before injection and 5, 10, 20, 30, 60 min after injection (n=4, error bars are  $\pm$ s.e.m).

**Supplementary Fig. 7**

**Uncropped images of all Western blots.**

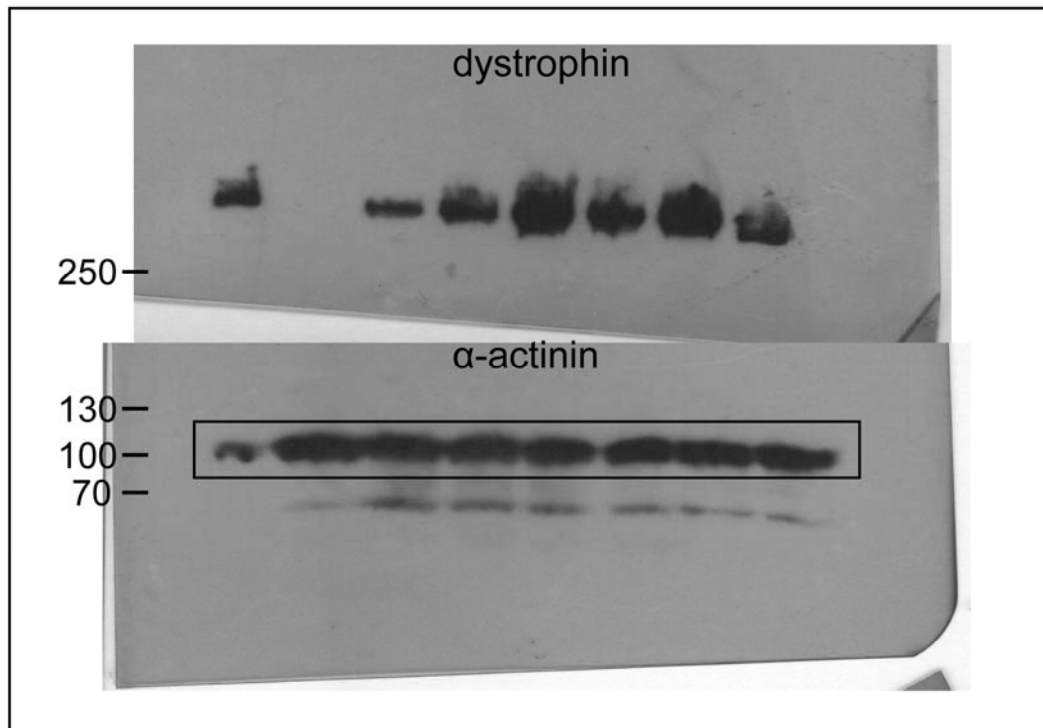

**Uncropped membranes for Figure 1b**

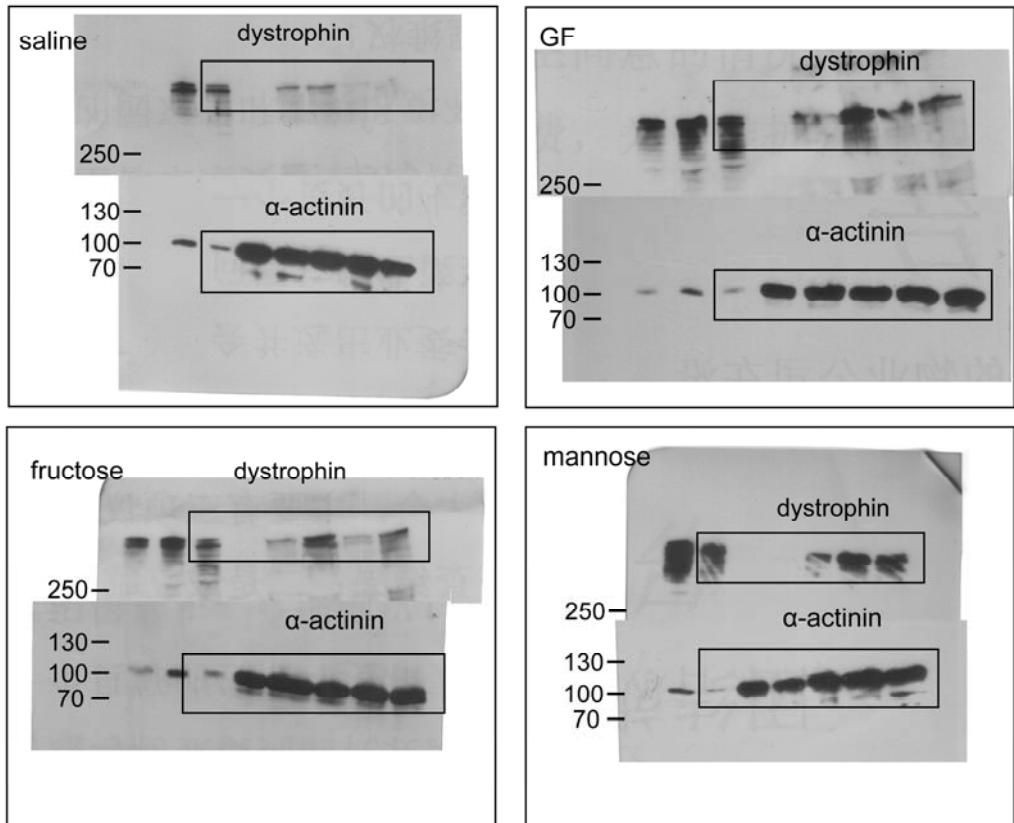

Uncropped membranes for Figure 1d

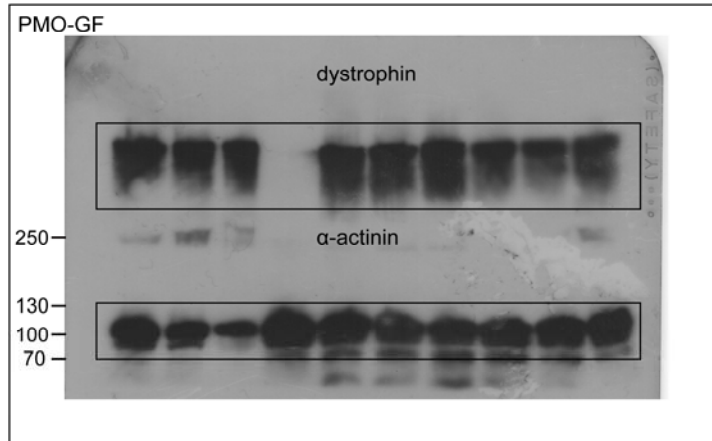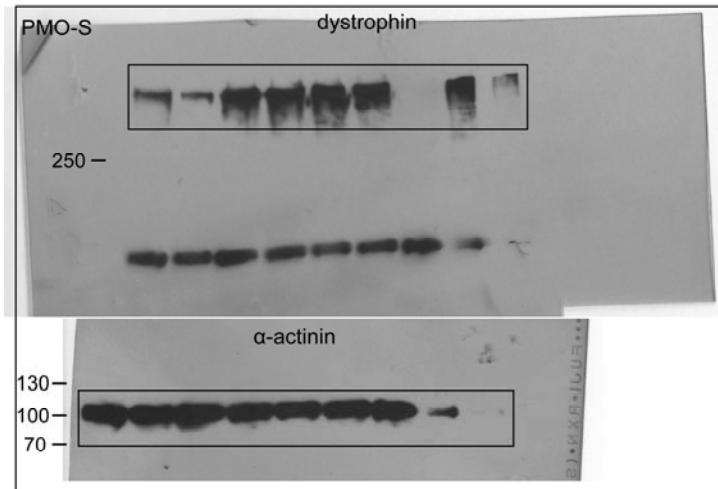

**Uncropped membranes for Figure 2c**

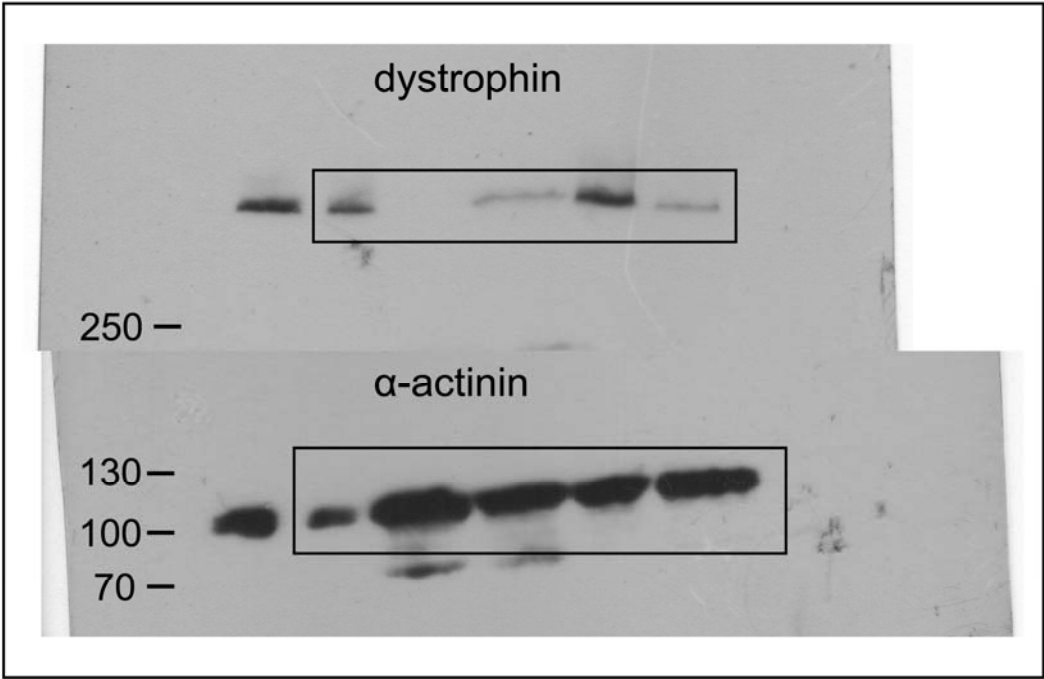

**Uncropped membranes for Figure 3b**

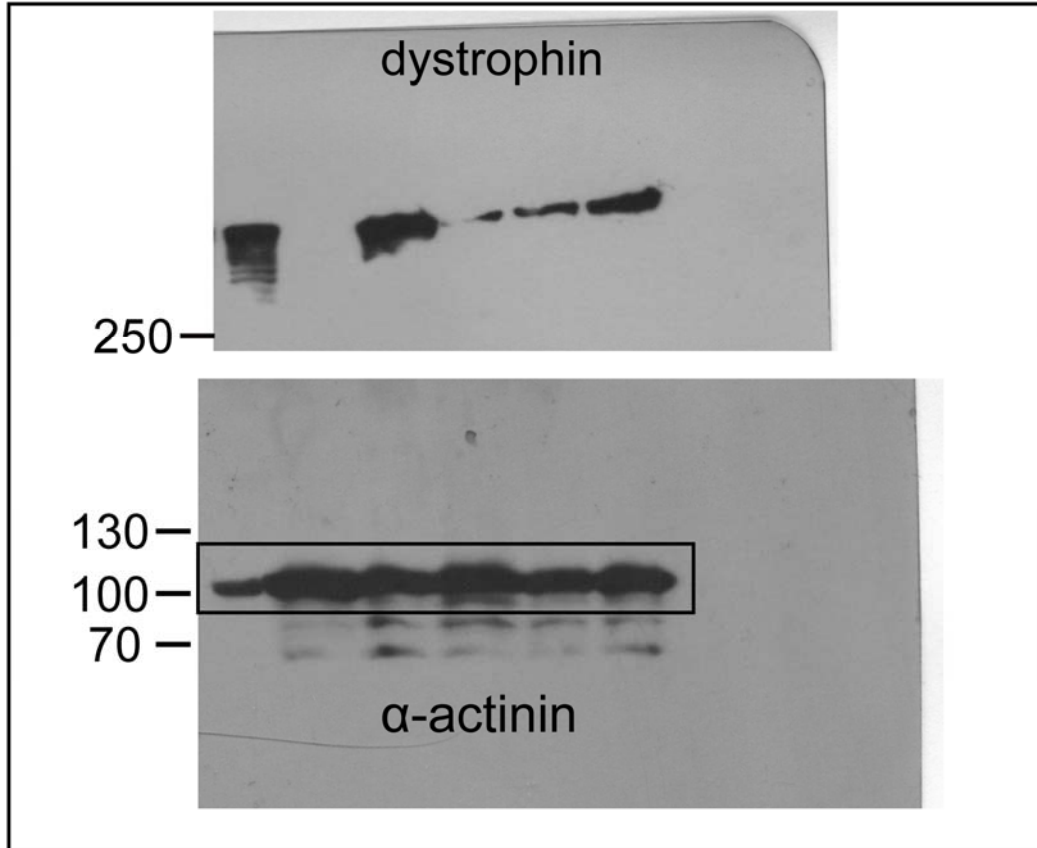

**Uncropped membranes for Figure 3g**

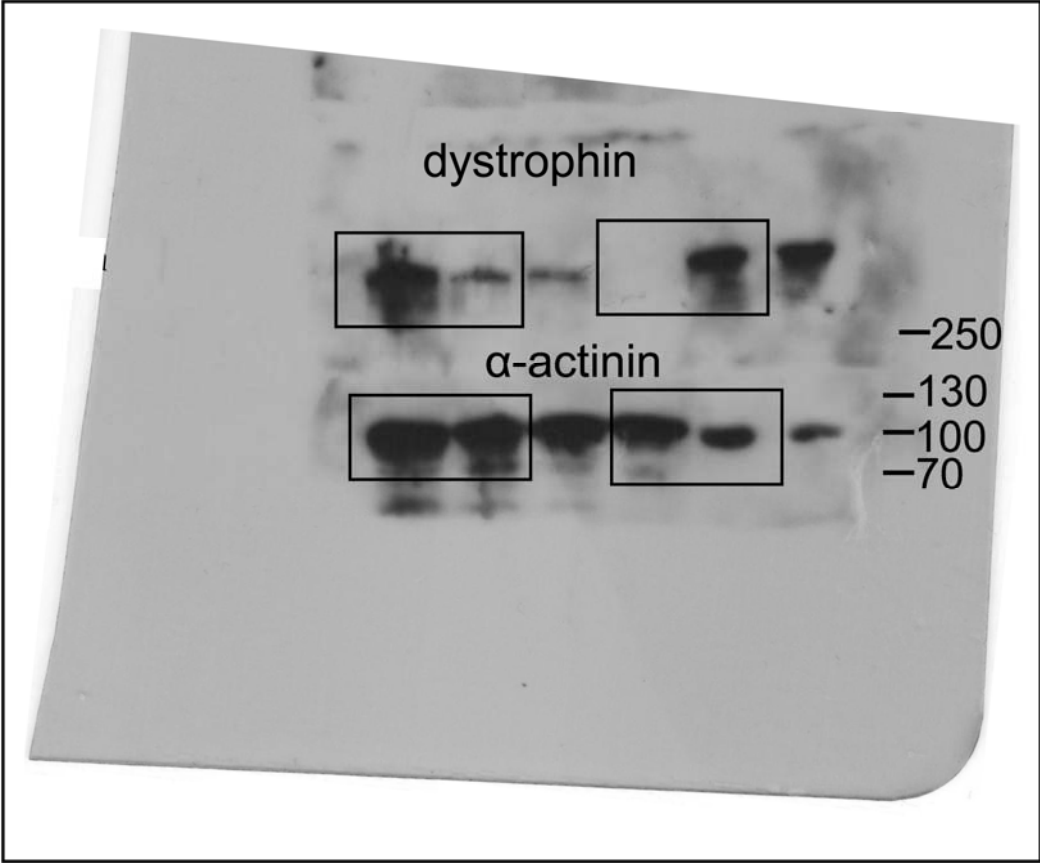

**Uncropped membranes for Figure 3i**

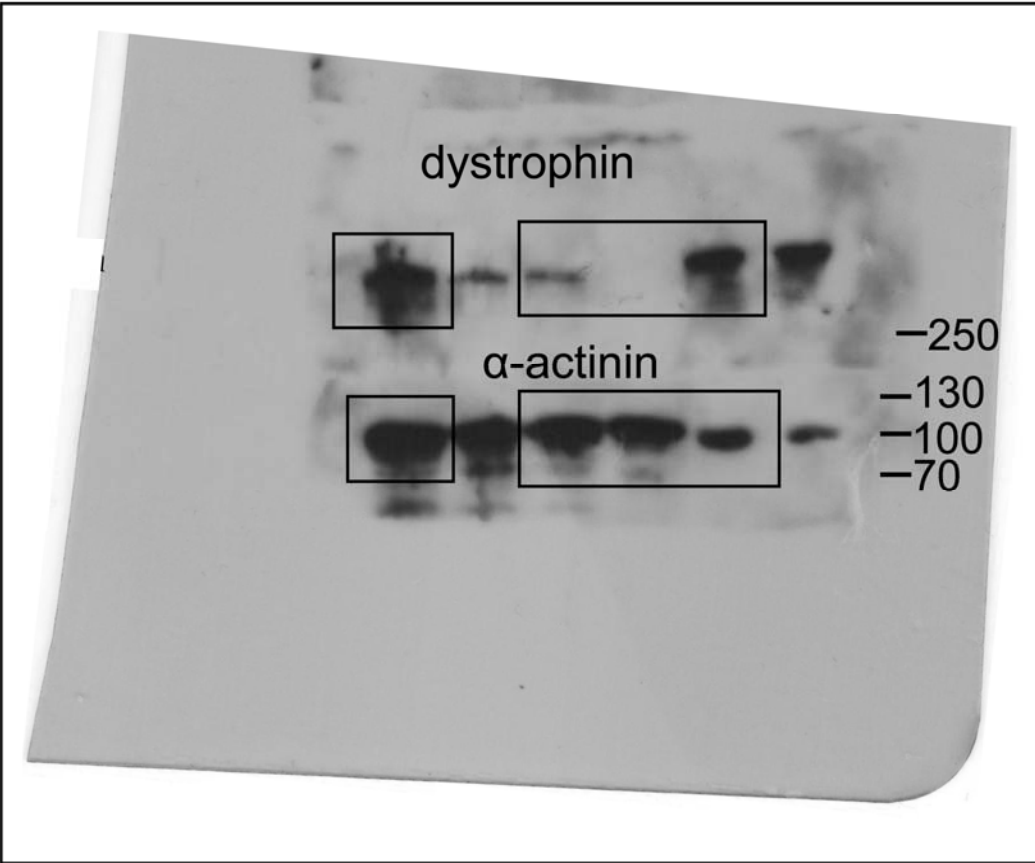

Uncropped membranes for Figure 4b



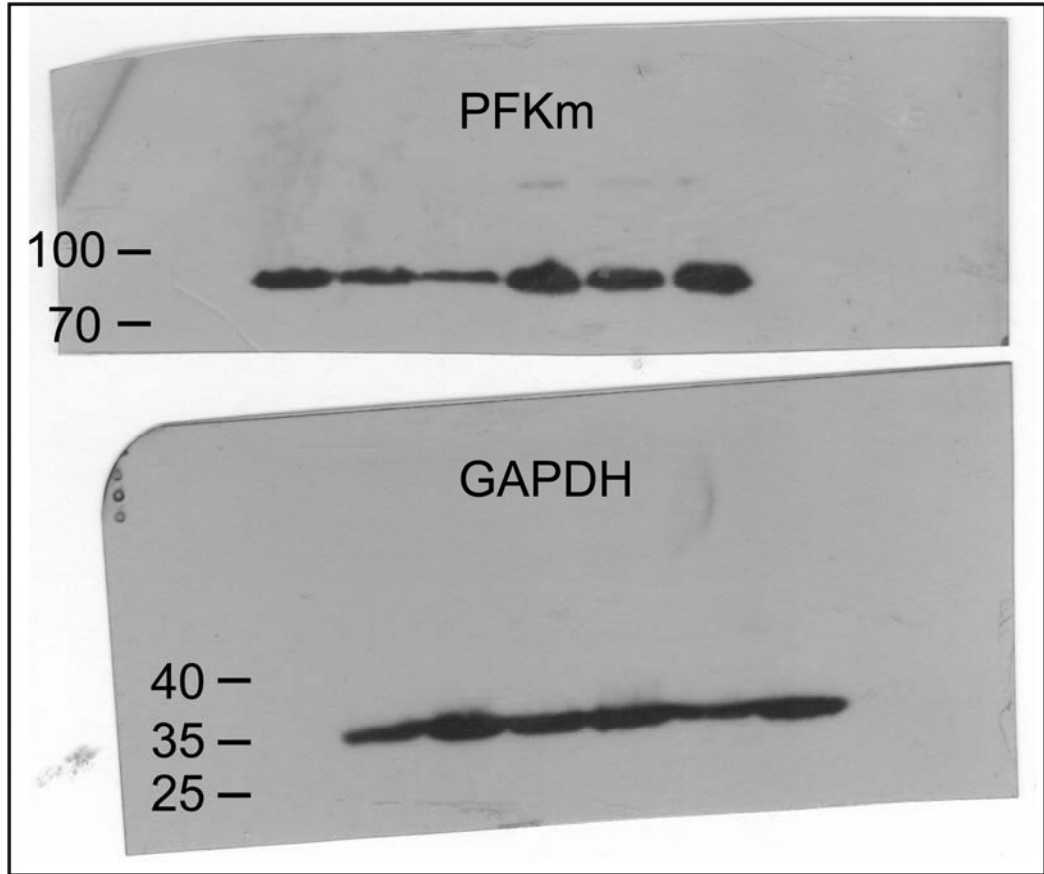

Uncropped membranes for Figure 4c

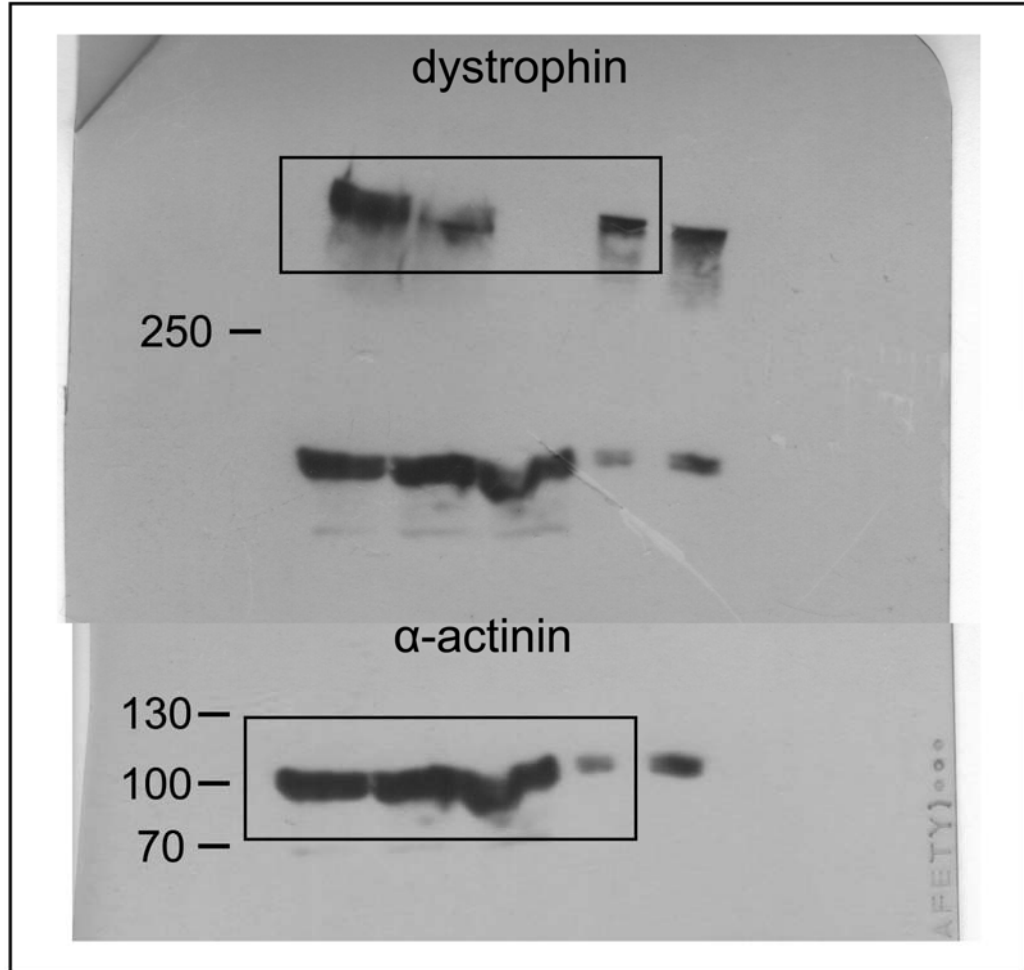

**Uncropped membranes for Figure 4f**

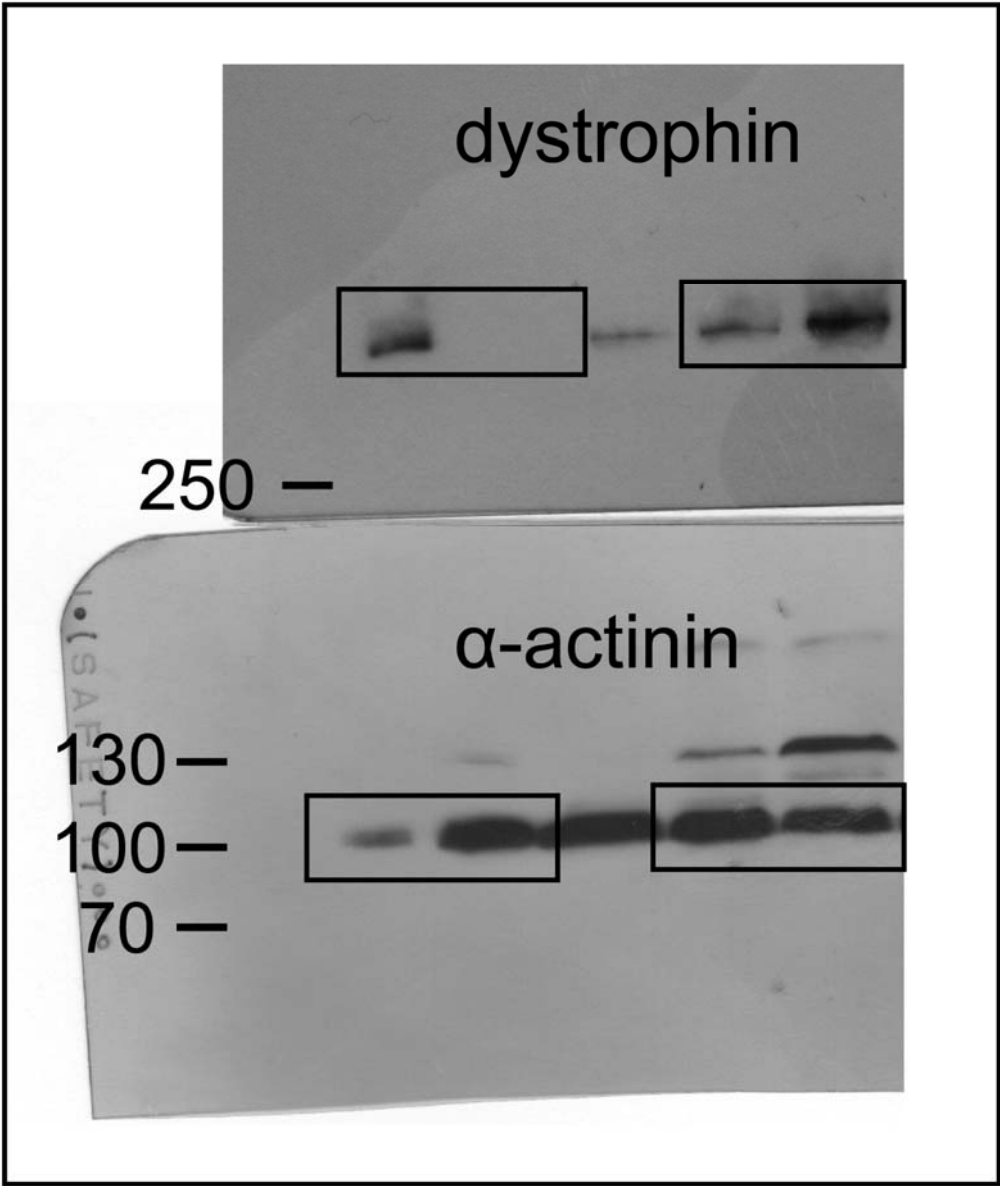

Uncropped membranes for Figure 4h

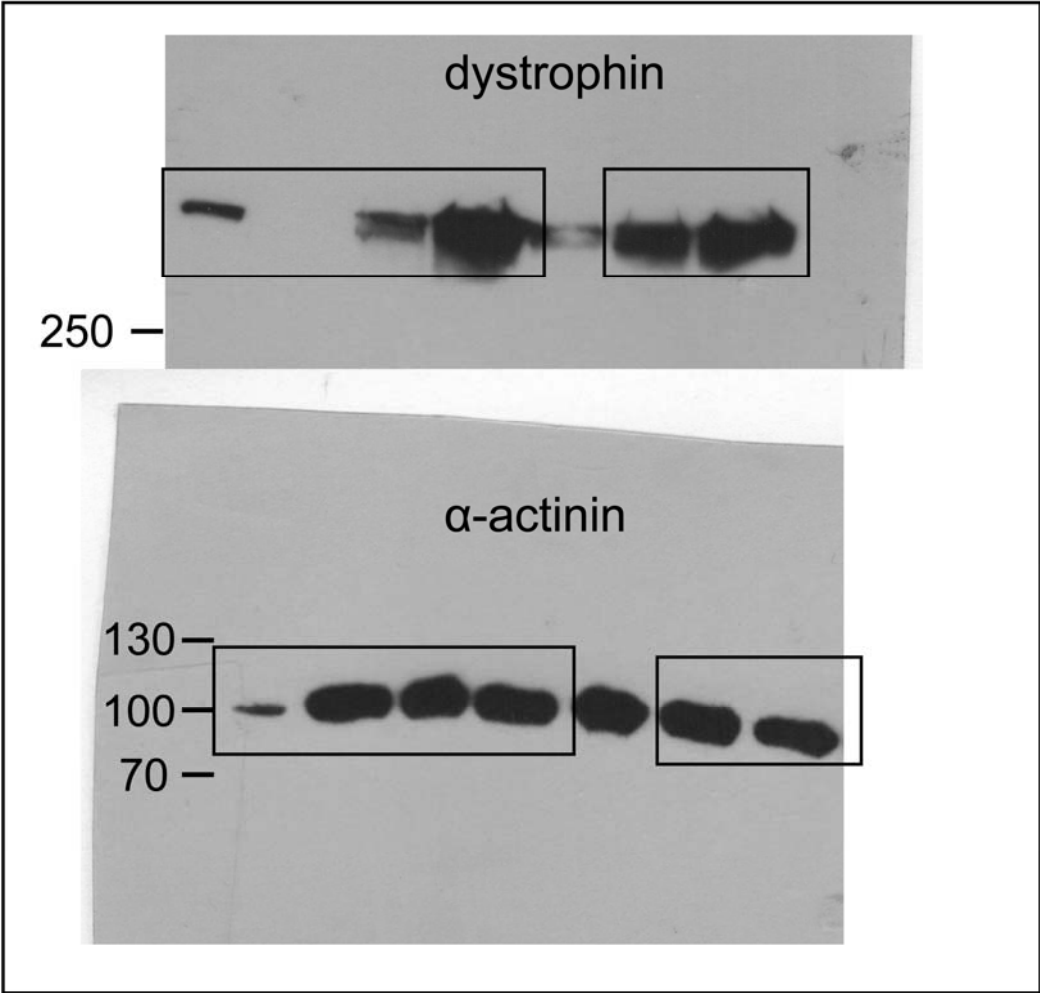

Uncropped membranes for Figure 5b

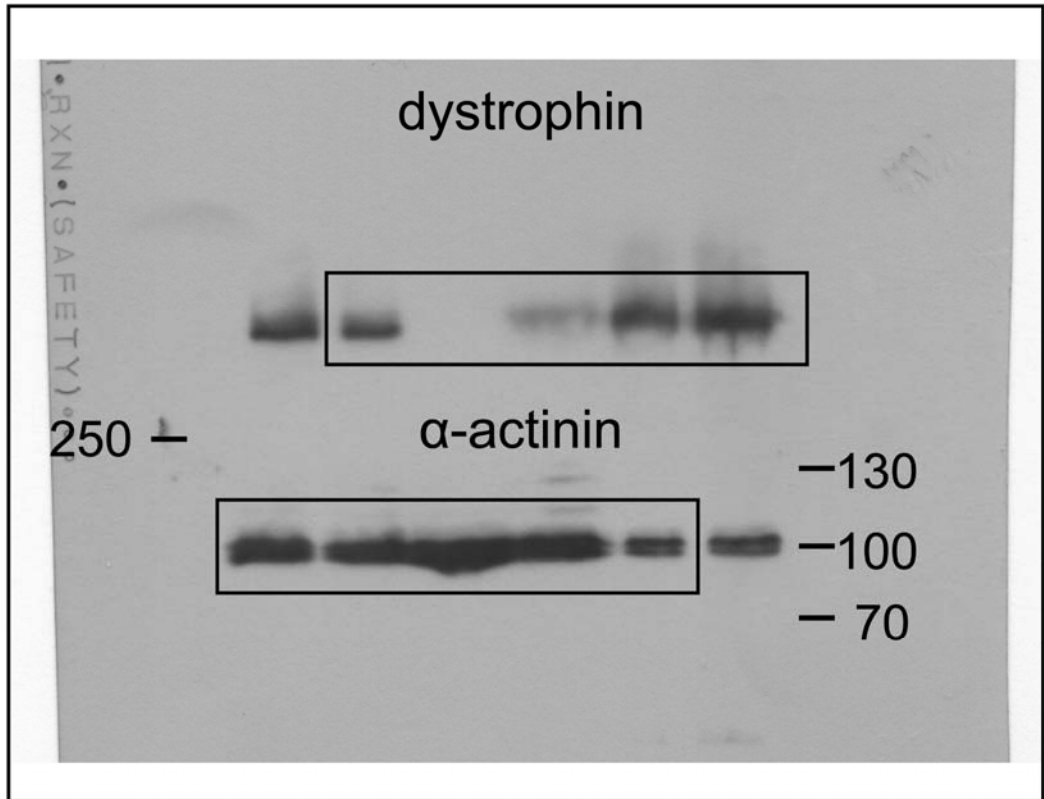

**Uncropped membranes for Figure 5d**

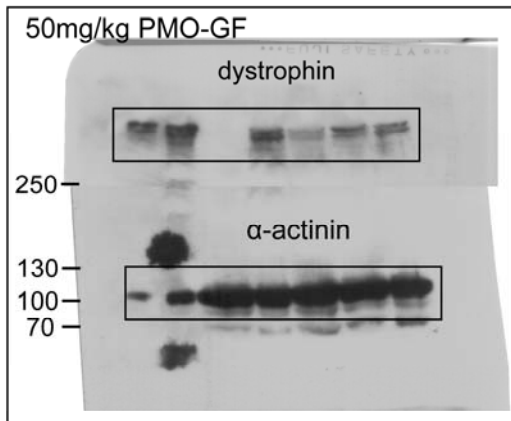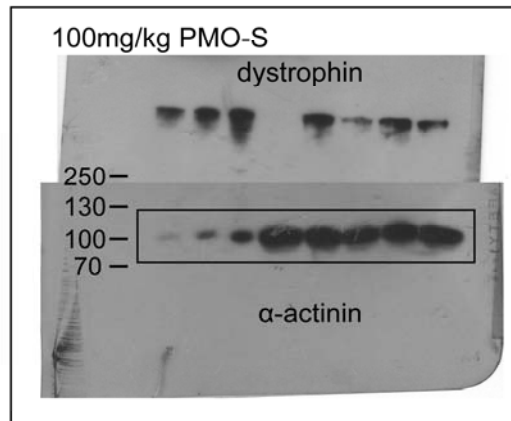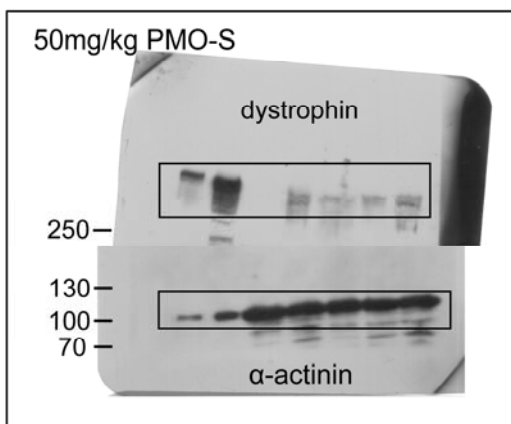

**Uncropped membranes for Supplementary Figure 1b**

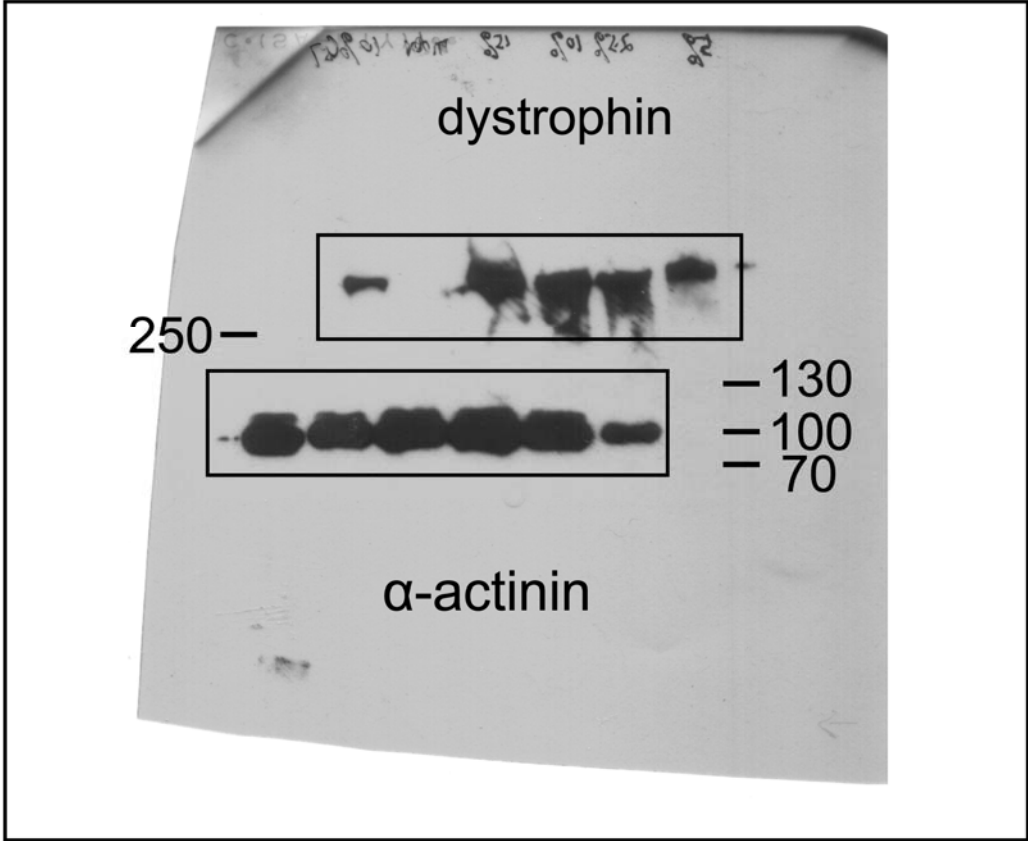

**Uncropped membranes for Supplementary Figure 3d**
